# Supplementary material
Source: PubMed Central journal article supplement (PMC4561729)

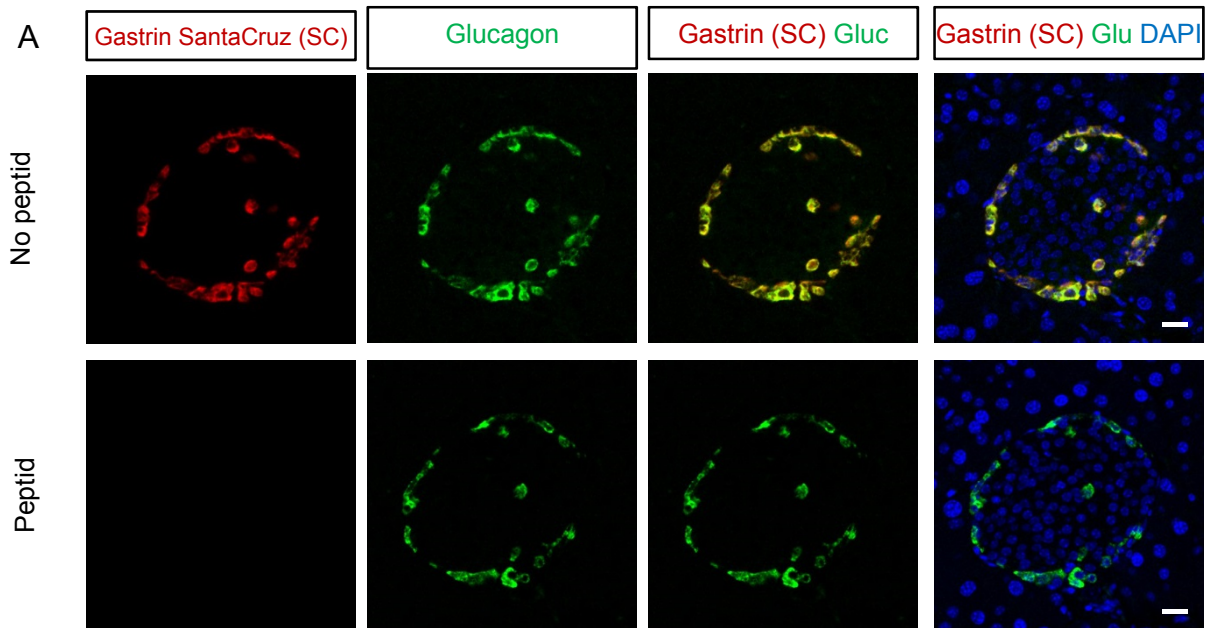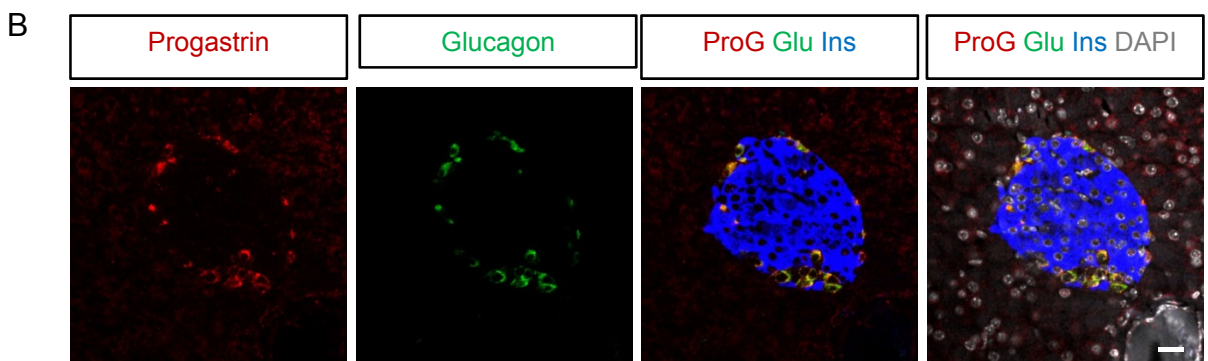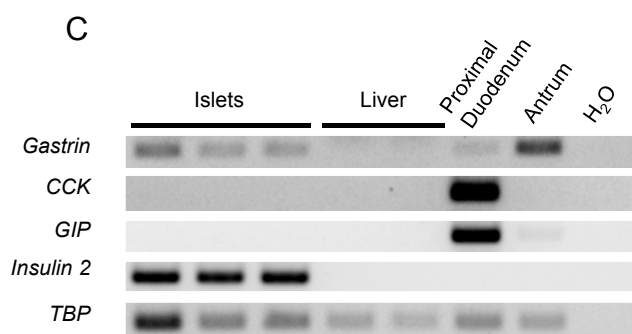

Supplement: MCB.00302-15_zmb999100959so3.pdf [file MCB.00302-15_zmb999100959so3.pdf]

Supplemental Figure S2

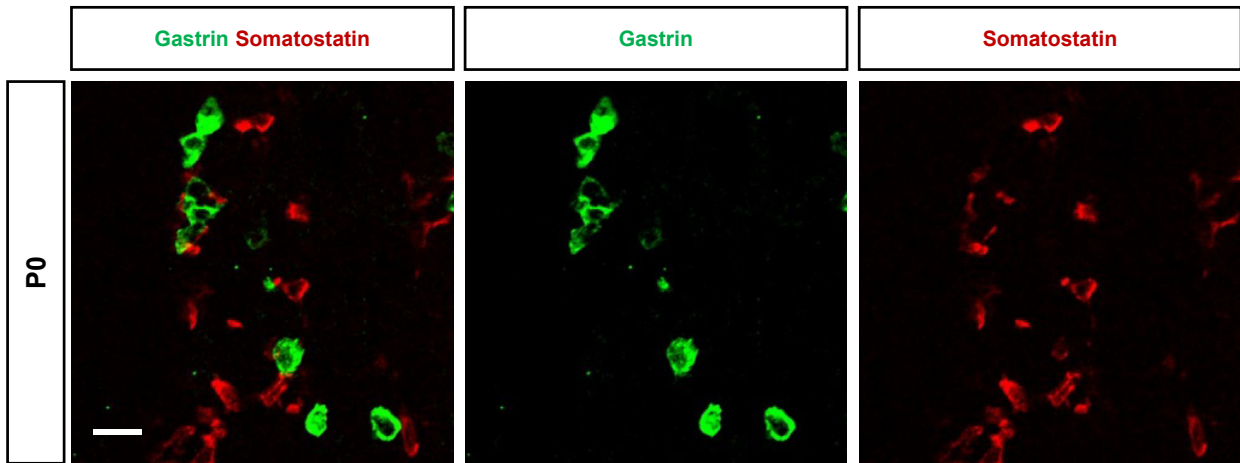

Supplement: MCB.00302-15_zmb999100959so4.pdf [file MCB.00302-15_zmb999100959so4.pdf]

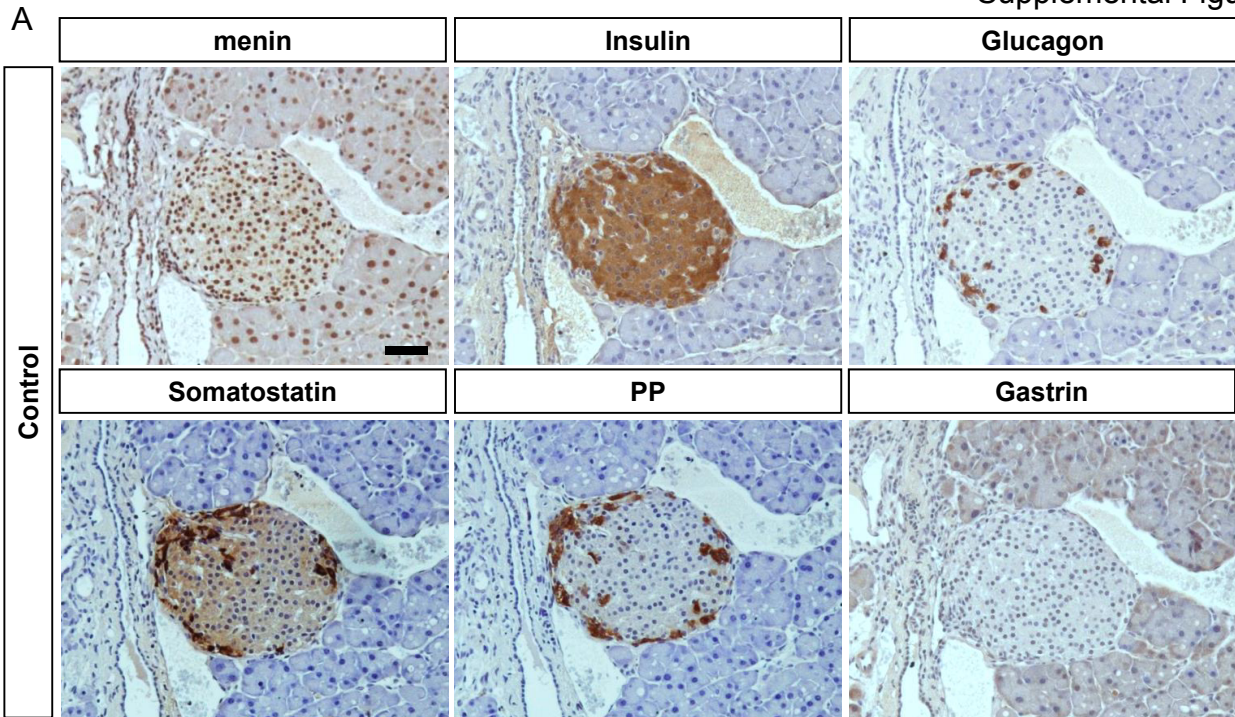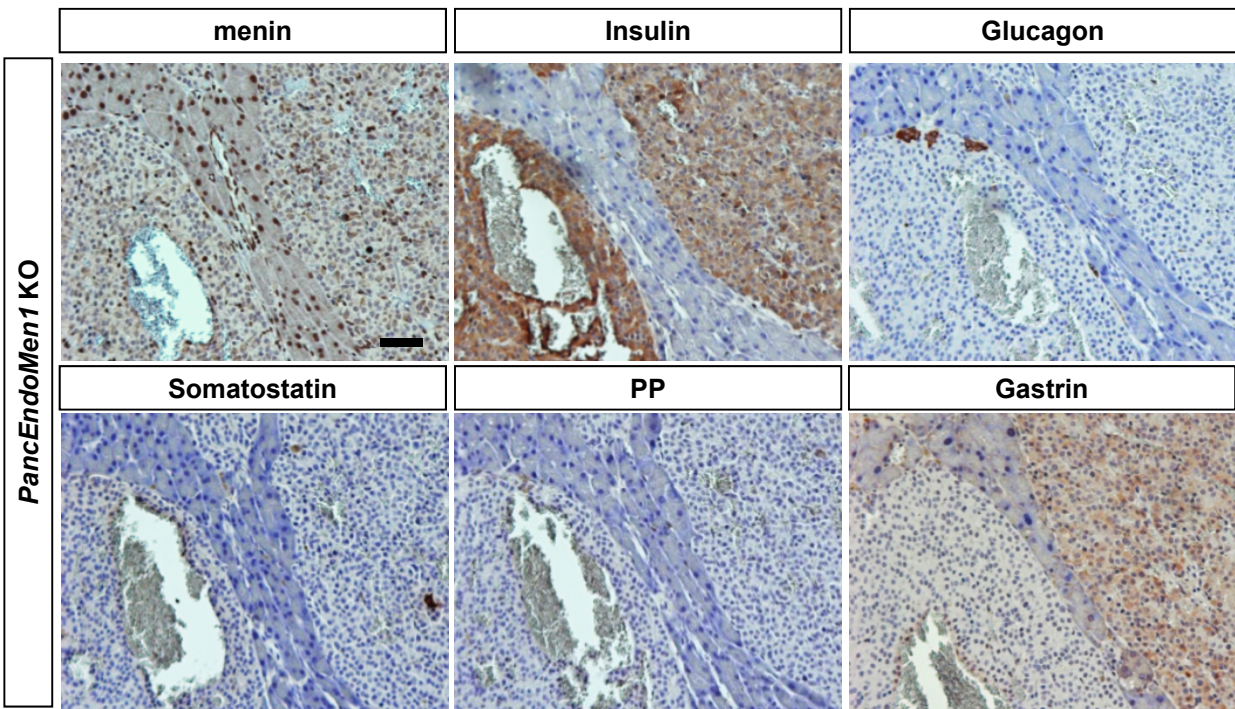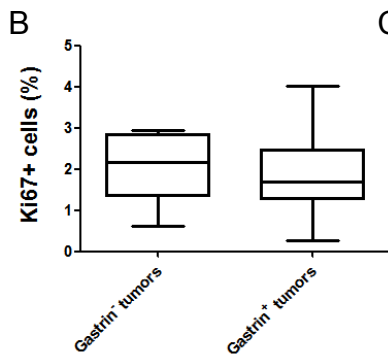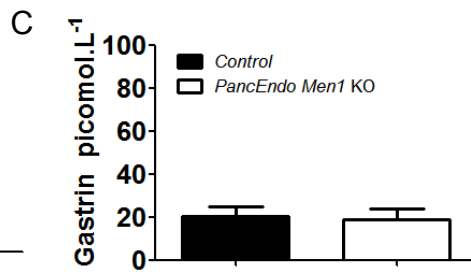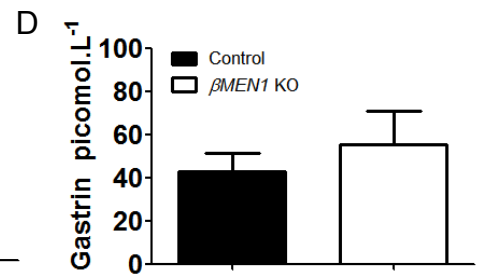

Supplement: MCB.00302-15_zmb999100959so5.pdf [file MCB.00302-15_zmb999100959so5.pdf]
